# Supplementary material for: Synthesis and photocatalytic property of Au–TiO2 nanocomposites with controlled morphologies in microfluidic chips
Source: Royal Society of Chemistry journal article supplement (doi:10.1039/d3lc01053h), 2024-01-01
Supplement: d3lc01053h1.pdf [file d3lc01053h1.pdf]

### 1. Synthesis of Au NR@TiO<sub>2</sub> core-shell, Au NR-TiO<sub>2</sub> dumbbell structure in a batch reactor

To begin with, 0.5 mL of pre-prepared gold nanorods (Au NRs) were dispersed in 2 mL of water and subjected to five minutes of ultrasonication to ensure effective dispersion. Subsequently, 200  $\mu\text{L}$  of  $\text{TiCl}_3$  was diluted in 4 mL of  $\text{H}_2\text{O}$ . In order to control the hydrolysis degree of  $\text{TiCl}_3$  and obtain varying amounts of  $\text{TiO}_2$ , different volumes of 0.5 M  $\text{NaHCO}_3$  solution were added dropwise to the reaction solution with continuous stirring. The Au NRs solution was then immediately injected. The resulting mixture was stirred at room temperature for 30 minutes, yielding a series of Au-TiO<sub>2</sub> nanostructures with distinct morphologies. As the concentration of  $\text{NaHCO}_3$  decreased, the Au-TiO<sub>2</sub> nanocomposites could transform from a core-shell structure to a dumbbell structure. Finally, the samples were collected, washed twice with ethanol, and dispersed in deionized water.

When synthesized in a beaker, the concentration of sodium bicarbonate solution was 1 M. SEM images of the synthesized Au-TiO<sub>2</sub> nanostructures are shown below (Figure S1). Figure S1a shows the thick Au NR-TiO<sub>2</sub> core-shell structure synthesized with 1500  $\mu\text{L}$  of  $\text{NaHCO}_3$  solution, while figure S1b shows the thin Au NR-TiO<sub>2</sub> core-shell structure synthesized with 1440  $\mu\text{L}$  of  $\text{NaHCO}_3$  solution. The SEM images indicate that by varying the amount of sodium bicarbonate solution, the thickness of the outer TiO<sub>2</sub> layer of the Au NR-TiO<sub>2</sub> core-shell structure can be controlled.

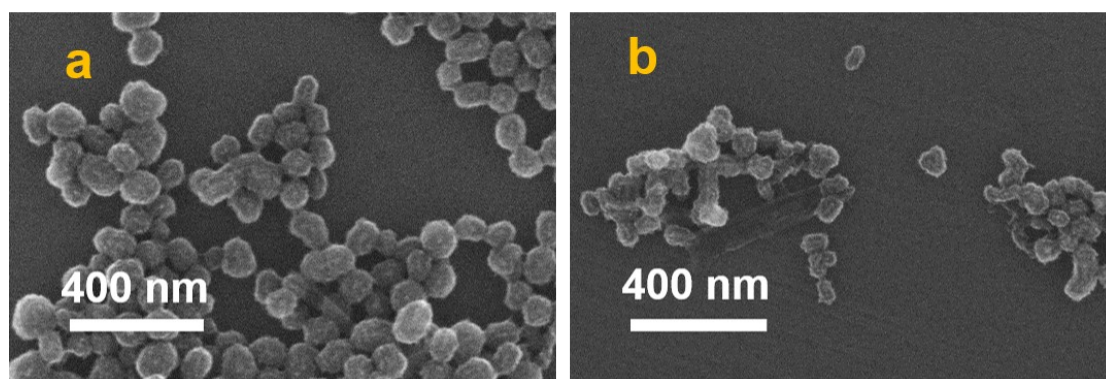

**Figure S1.** SEM images of Au NR@TiO<sub>2</sub> core-shell nanocomposites with decreasing amount of  $\text{NaHCO}_3$ . (a) Au NR@thick-TiO<sub>2</sub>,  $\text{NaHCO}_3$ :1500  $\mu\text{L}$ ; (b) Au NR@thin-TiO<sub>2</sub>,  $\text{NaHCO}_3$ :1440  $\mu\text{L}$ ;

As the amount of  $\text{NaHCO}_3$  solution is further reduced, SEM images reveal a transition of the Au NR-TiO<sub>2</sub> nanocomposite structure from a core-shell morphology to dumbbell-like structure. Moreover, as the volume of  $\text{NaHCO}_3$  continues to decrease, the TiO<sub>2</sub> at both ends of the dumbbell-shaped Au NR-TiO<sub>2</sub> structure also decreases. The  $\text{NaHCO}_3$  volumes for Figures S2a, b, and c are 1380  $\mu\text{L}$ , 1320  $\mu\text{L}$ , and 1260  $\mu\text{L}$ , respectively.

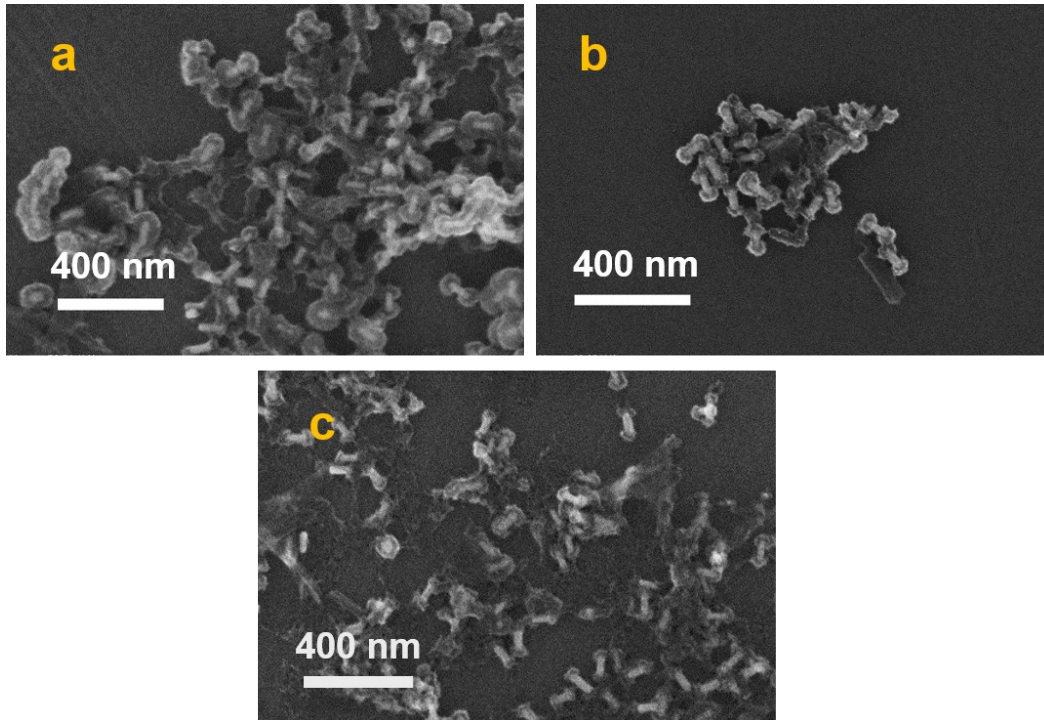

**Figure S2.** SEM images of Au NR-TiO<sub>2</sub> dumbbell-like nanocomposites with decreasing amount of NaHCO<sub>3</sub>: (a) 1380  $\mu$ L; (b) 1320  $\mu$ L; (c) 1260  $\mu$ L.

## 2. Synthesis of Au NR-TiO<sub>2</sub> dandelion structure in a batch reactor

To start, 0.2M CTAB solution was added to 1.3 mL of water, followed by the addition of 0.5 mL of pre-prepared gold nanorods (Au NRs), and subjected to five minutes of ultrasonication for dispersion. Subsequently, 200  $\mu$ L of TiCl<sub>3</sub> was diluted in 4 mL of H<sub>2</sub>O, then 700  $\mu$ L of 1M NaHCO<sub>3</sub> solution was added dropwise to the TiCl<sub>3</sub> solution with continuous stirring. The pre-prepared CTAB-Au NRs solution was then immediately added, and the mixture was stirred at room temperature for half an hour. Finally, the samples were washed twice with ethanol and dispersed in deionized water.

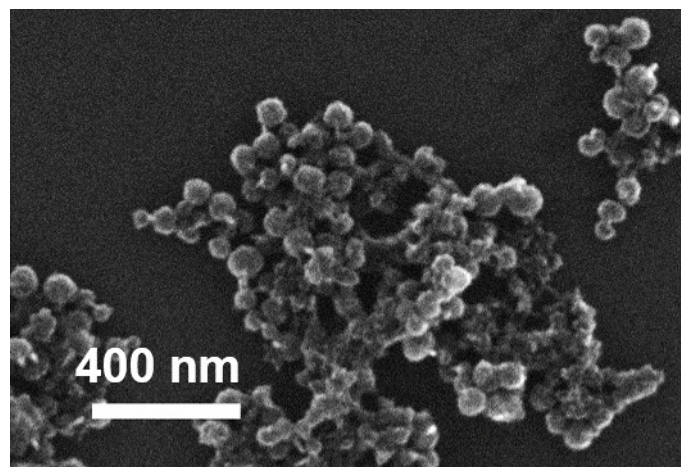

**Figure S3.** SEM images of Au NR-TiO<sub>2</sub> dandelion-like nanocomposites with decreasing amount of NaHCO<sub>3</sub> (700  $\mu$ L).

### 3. Morphological characterization after photocatalysis

Figure 4 shows the SEM images of the core-shell and dumbbell structures of Au NR-TiO<sub>2</sub> after photocatalysis. Based on the analysis of SEM images, it can be observed that the overall morphology of the Au NRs-TiO<sub>2</sub> nanocomposites remains unchanged before and after catalysis.

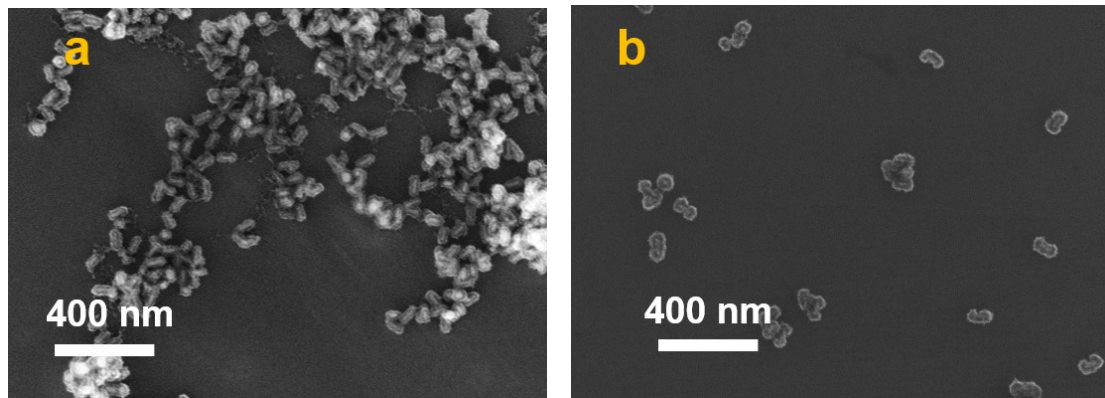

**Figure S4.** SEM images of the core-shell (a) and dumbbell (b) structures of Au NR-TiO<sub>2</sub> after photocatalysis

### 4. X-Ray Diffraction (XRD) result

The XRD pattern provides further evidence for the formation of TiO<sub>2</sub> shell crystals only the typical diffraction peaks indicating that the TiO<sub>2</sub> shell is amorphous.

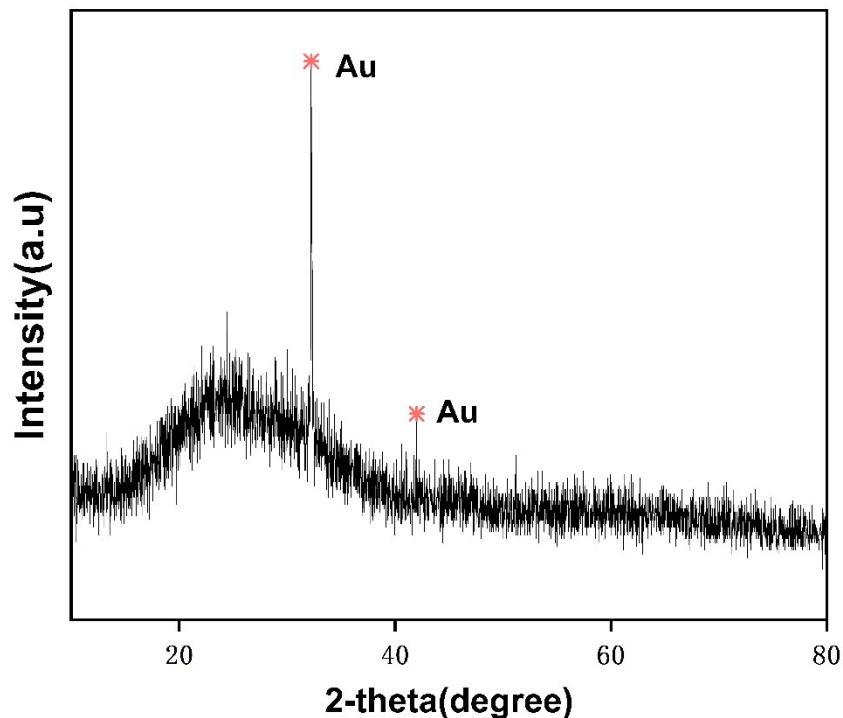

**Figure S5.** XRD result of Au NR@TiO<sub>2</sub> core-shell nanostructures
